# Supplementary material for: Morbidity outcomes after surgical aortic valve replacement
Source: PubMed Central journal article supplement — Open Heart. 2017 Apr 13;4(1):e000588. doi: 10.1136/openhrt-2017-000588 (PMC5471875; doi:10.1136/openhrt-2017-000588), 2017-04-13
Supplement: openhrt-2017-000588supp001.pdf [file openhrt-2017-000588supp001.pdf]

Table S1 Baseline characteristics in patients attending follow-up vs. not

| Variables                          | Operated<br>(n = 351)   |                            |                               | P     | Non-operated<br>(n = 91)  |                               | P     |
|------------------------------------|-------------------------|----------------------------|-------------------------------|-------|---------------------------|-------------------------------|-------|
|                                    | All patients<br>n = 442 | FU<br>(n = 304)<br>[86.6%] | Not FU<br>(n = 47)<br>[13.4%] |       | FU<br>(n = 57)<br>[62.6%] | Not FU<br>(n = 34)<br>[37.4%] |       |
| <b>Demography</b>                  |                         |                            |                               |       |                           |                               |       |
| Mean age, years                    | 74±11                   | 72±10                      | 76±10                         | 0.021 | 80±10                     | 83±7                          | 0.197 |
| Male sex – n (%)                   | 249 (56.3)              | 180 (59.2)                 | 25 (53.2)                     | 0.436 | 30 (52.6)                 | 14 (41.1)                     | 0.290 |
| Married or partner – n (%)         | 270 (61.1)              | 201 (69.8)                 | 22 (47.8)                     | 0.003 | 33 (64.7)                 | 14 (46.6)                     | 0.112 |
| Body mass index, kg/m <sup>2</sup> | 26±5                    | 26±4                       | 26±4                          | 0.284 | 25±5                      | 25±5                          | 0.851 |
| <b>Medical history – n (%)</b>     |                         |                            |                               |       |                           |                               |       |
| Hypertension                       | 202 (45.7)              | 142 (46.7)                 | 20 (42.6)                     | 0.595 | 24 (42.1)                 | 16 (47.1)                     | 0.645 |
| Heart failure                      | 28 (6.3)                | 12 (4.0)                   | 5 (10.6)                      | 0.047 | 4 (7.0)                   | 7 (20.6)                      | 0.055 |
| Atrial fibrillation, all types     | 94 (21.3)               | 55 (18.1)                  | 10 (21.3)                     | 0.601 | 11 (19.3)                 | 18 (52.9)                     | 0.001 |
| Diabetes mellitus                  | 48 (10.9)               | 24 (7.9)                   | 7 (14.9)                      | 0.116 | 10 (17.5)                 | 1 (20.6)                      | 0.719 |
| Pulmonary disease                  | 77 (17.4)               | 49 (16.1)                  | 8 (17.0)                      | 0.876 | 9 (15.8)                  | 11 (32.4)                     | 0.065 |
| Kidney disease                     | 25 (5.7)                | 10 (3.3)                   | 5 (10.6)                      | 0.020 | 4 (7.0)                   | 6 (17.6)                      | 0.117 |
| Coronary artery disease            | 131 (29.6)              | 87 (28.6)                  | 19 (40.4)                     | 0.101 | 9 (15.8)                  | 16 (47.1)                     | 0.001 |
| <b>Clinical findings</b>           |                         |                            |                               |       |                           |                               |       |
| Systolic blood pressure, mmHg      | 143±22                  | 144±22                     | 146±22                        | 0.590 | 143±23                    | 134±26                        | 0.117 |

|                                   |       |       |       |       |       |       |       |
|-----------------------------------|-------|-------|-------|-------|-------|-------|-------|
| Diastolic blood pressure,<br>mmHg | 77±12 | 78±12 | 76±11 | 0.309 | 74±13 | 74±12 | 0.770 |
|-----------------------------------|-------|-------|-------|-------|-------|-------|-------|

|                       |       |       |       |       |       |       |       |
|-----------------------|-------|-------|-------|-------|-------|-------|-------|
| Heart rate, beats/min | 73±13 | 72±13 | 76±14 | 0.076 | 73±12 | 76±14 | 0.395 |
|-----------------------|-------|-------|-------|-------|-------|-------|-------|

---

**Medication – n(%)**

|                    |            |            |           |       |           |           |       |
|--------------------|------------|------------|-----------|-------|-----------|-----------|-------|
| Betablocker        | 206 (46.6) | 137 (45.1) | 20 (42.6) | 0.747 | 27 (47.4) | 22 (64.7) | 0.109 |
| ACEi/ARB           | 178 (40.3) | 113 (37.2) | 22 (46.8) | 0.021 | 32 (56.1) | 11 (32.4) | 0.028 |
| Calcium antagonist | 89 (20.1)  | 65 (21.4)  | 6 (12.8)  | 0.171 | 10 (17.5) | 8 (23.5)  | 0.488 |
| Statin             | 233 (52.7) | 162 (53.3) | 30 (63.8) | 0.177 | 28 (49.1) | 13 (38.2) | 0.313 |
| Diuretic           | 165 (37.3) | 87 (28.6)  | 20 (42.6) | 0.053 | 31 (54.4) | 27 (79.4) | 0.016 |
| Warfarin           | 90 (20.4)  | 51 (16.8)  | 10 (21.3) | 0.449 | 12 (21.0) | 17 (50.0) | 0.004 |
| Platelet inhibitor | 231 (52.3) | 164 (54.0) | 26 (55.3) | 0.861 | 29 (50.9) | 12 (35.3) | 0.148 |
| Digitalis          | 31 (7.0)   | 15 (4.9)   | 4 (8.5)   | 0.313 | 3 (5.3)   | 9 (26.5)  | 0.004 |

---

**Charlson comorbidity**

0.005 0.046

**index – n (%)**

|     |            |            |           |           |           |
|-----|------------|------------|-----------|-----------|-----------|
| 0   | 177 (40.0) | 134 (44.1) | 16 (34.0) | 21 (36.8) | 6 (17.7)  |
| 1-2 | 213 (48.2) | 149 (49.0) | 21 (44.7) | 27 (47.4) | 16 (47.1) |
| ≥3  | 52 (11.8)  | 21 (6.9)   | 10 (21.3) | 9 (15.8)  | 12 (35.3) |

---

**Surgical risk score**

|                                |          |          |          |        |          |           |        |
|--------------------------------|----------|----------|----------|--------|----------|-----------|--------|
| Euro(II)SCORE,<br>median (IQR) | 2 (1, 4) | 2 (3, 1) | 3 (5, 2) | 0.0003 | 3 (6, 2) | 7 (11, 4) | 0.0003 |
|--------------------------------|----------|----------|----------|--------|----------|-----------|--------|

---

**NYHA classification – n**

0.207 0.002

(%)

|              |          |            |           |           |           |
|--------------|----------|------------|-----------|-----------|-----------|
| Class I      | 48 (11)  | 18 (5.9)   | 3 (6.4)   | 20 (35.1) | 7 (20.6)  |
| Class II     | 205 (46) | 158 (52.0) | 18 (38.3) | 23 (40.4) | 6 (17.7)  |
| Class III/IV | 189 (43) | 128 (42.1) | 26 (55.3) | 14 (24.6) | 21 (61.8) |

---

|                                    |            |             |             |        |             |             |       |
|------------------------------------|------------|-------------|-------------|--------|-------------|-------------|-------|
| <b>CCS angina score – n (%)</b>    |            |             |             | 0.712  |             |             | 0.260 |
| Score 0                            | 251 (56.8) | 161 (53.0)  | 25 (53.2)   |        | 44 (77.2)   | 21 (61.7)   |       |
| Score 1-2                          | 163 (36.9) | 126 (41.5)  | 18 (38.3)   |        | 10 (17.5)   | 9 (26.5)    |       |
| Score 3-4                          | 28 (6.3)   | 17 (5.6)    | 4 (8.5)     |        | 3 (5.3)     | 4 (11.8)    |       |
| <b>Echocardiographic measures</b>  |            |             |             |        |             |             |       |
| SWTd, cm                           | 1.1±0.2    | 1.1±0.2     | 1.1±0.2     | 0.405  | 1.2±0.2     | 1.1±0.2     | 0.295 |
| LVIDd, cm                          | 5.0 ±0.6   | 5.0±0.6     | 5.1±0.7     | 0.827  | 4.9±0.6     | 4.9±0.7     | 0.876 |
| PWTd, cm                           | 0.9 ±0.1   | 0.9±0.1     | 0.9±0.2     | 0.190  | 0.9±0.1     | 0.8±0.1     | 0.034 |
| LVEF, %                            | 56.2±9.2   | 56.9±8.3    | 54.0±10.2   | 0.034  | 57.0±10.0   | 51.8±12.5   | 0.039 |
| Cardiac output, l/min              | 4.9 ±1.2   | 5.0±1.2     | 4.9±1.2     | 0.656  | 4.9±1.2     | 4.2±1.3     | 0.015 |
| Aortic peak velocity, m/s          | 4.7 ±0.8   | 4.7±0.8     | 4.8±0.8     | 0.790  | 4.5±0.7     | 4.6±0.8     | 0.796 |
| Aortic mean gradient, mmHg         | 55±18      | 56±18       | 56±19       | 0.892  | 50±16       | 52±21       | 0.523 |
| Aortic valve area, cm <sup>2</sup> | 0.7 ±0.2   | 0.7±0.2     | 0.7±0.2     | 0.263  | 0.7±0.2     | 0.6±0.2     | 0.001 |
| <b>Biochemical values</b>          |            |             |             |        |             |             |       |
| Haemoglobin, g/dL                  | 13.6±1.6   | 13.8±1.5    | 13.3±1.5    | 0.028  | 13.3±1.8    | 12.8±2.0    | 0.250 |
| Blood platelets *10 <sup>9</sup>   | 251±70     | 253±69      | 243±58      | 0.377  | 256±72      | 234±90      | 0.208 |
| hs-CRP, mg/l                       | 5.1±9      | 4.6±8.4     | 5.3±6.2     | 0.586  | 4.4±7.5     | 10.5±16.7   | 0.020 |
| HbA1c, %                           | 5.9±0.8    | 5.9±0.7     | 5.9±0.7     | 0.615  | 6.0±1.2     | 6.0±0.6     | 0.852 |
| Kreatinin, µmol/L                  | 87±29      | 83±27       | 97±35       | 0.002  | 89±24       | 99±40       | 0.130 |
| eGFR, ml/min                       | 74±33      | 81±33       | 63±25       | 0.0006 | 62±30       | 52±27       | 0.118 |
| NT-proBNP, pmol/L                  | 91         | 65          | 127         | 0.003  | 133         | 302         | 0.009 |
| median (IQR)                       | (33, 234)  | (172, 29)   | (244, 47)   |        | (389, 49)   | (614, 185)  |       |
| hs-TnT, ng/mL,                     | 14 (10-25) | 11 (21, 10) | 14 (25, 10) | 0.410  | 16 (29, 10) | 28 (50, 15) | 0.004 |
| median (IQR)                       |            |             |             |        |             |             |       |

| <b>Patient reported outcomes</b> |           |           |           |       |           |           |       |
|----------------------------------|-----------|-----------|-----------|-------|-----------|-----------|-------|
| Summary PCS                      | 39±11     | 40±11     | 35±9      | 0.003 | 38±12     | 31±12     | 0.010 |
| Summary MCS                      | 50±11     | 50±11     | 47±14     | 0.115 | 50±13     | 46±14     | 0.179 |
| EQ-5D UK Index score             | 0.72±0.22 | 0.74±0.21 | 0.72±0.20 | 0.623 | 0.71±0.24 | 0.55±0.29 | 0.007 |
| EQ-VAS score                     | 59±22     | 61±21     | 55±23     | 0.097 | 61±23     | 48±24     | 0.012 |
| <b>Six-Minute Walk test, m</b>   | 446±133   | 464±124   | 430±147   | 0.172 | 412±144   | 287±102   | 0.003 |
| <b>MMSE score</b>                | 28.1±2.4  | 28.5±1.6  | 27.9±2.2  | 0.022 | 27.2±3.8  | 26.6±3.0  | 0.475 |

Plus-minus values are means ±SD. P-values for comparison between operated and non-operated patients. FU, followed up; IQR, interquartile range; ACEi, angiotensin converting enzyme inhibitor; ARB, angiotensin receptor blocker; Euro(II)SCORE, European System for Cardiac Operative Risk Evaluation; NYHA, New York Heart Association; CCS, Canadian Cardiovascular Society; SWTd, septal wall thickness at end-diastole; LVIDd, left ventricular internal dimension at end diastole; PWTd, posterior wall thickness at end-diastole; LVEF, left ventricular ejection fraction; hs-CRP, high-sensitive C-reactive protein; eGFR, estimated glomerular filtration rate (Cockcroft-Gault formula); NT-proBNP, N-terminal pro brain natriuretic peptide; hs-TnT, high-sensitive troponin T; PCS, physical component summary; MCS, mental component summary; EQ-5D UK, EuroQol 5 dimensions United Kingdom; EQ-VAS, EuroQol visual analogue scale; MMSE, Mini-mental state examination.
