# Supplementary material for: Morbidity outcomes after surgical aortic valve replacement
Source: PubMed Central journal article supplement — Open Heart. 2017 Apr 13;4(1):e000588. doi: 10.1136/openhrt-2017-000588 (PMC5471875; doi:10.1136/openhrt-2017-000588), 2017-04-13
Supplement: openhrt-2017-000588supp002.pdf [file openhrt-2017-000588supp002.pdf]

Table S2. Factors associated with 3-year mortality among operated and unoperated patients in multivariable cox-regression analysis.

| Variable                       | Surgical AVR, n=351 |             |       | Unoperated patients, n=91 |             |       |
|--------------------------------|---------------------|-------------|-------|---------------------------|-------------|-------|
|                                | HR                  | [95% CI]    | P     | HR                        | [95% CI]    | P     |
| Age, years                     | 1.05                | [1.01-1.10] | 0.003 | 1.04                      | [0.99-1.09] | 0.125 |
| Gender(male)                   | 1.22                | [0.57-2.62] | 0.610 | 1.30                      | [0.66-2.57] | 0.453 |
| NYHA class III-IV              | 1.93                | [0.93-3.98] | 0.084 | 1.41                      | [0.68-2.91] | 0.353 |
| LVEF                           | 0.97                | [0.94-1.00] | 0.012 | 0.97                      | [0.94-1.00] | 0.044 |
| Coronary artery disease        | 1.45                | [0.69-3.05] | 0.148 | 2.18                      | [1.10-4.32] | 0.025 |
| Diabetes mellitus              | 1.84                | [0.69-4.86] | 0.064 | 1.58                      | [0.70-3.58] | 0.268 |
| Atrial fibrillation, all types | 1.41                | [0.66-3.01] | 0.310 |                           |             |       |

AVR, aortic valve replacement; HR, hazard ratio; CI, confidence interval; NYHA, New York Heart Association; LVEF, left ventricular ejection fraction. Unequal numbers of rows in the two groups is due different number of events.
