# Supplementary material for: Morbidity outcomes after surgical aortic valve replacement
Source: PubMed Central journal article supplement — Open Heart. 2017 Apr 13;4(1):e000588. doi: 10.1136/openhrt-2017-000588 (PMC5471875; doi:10.1136/openhrt-2017-000588), 2017-04-13
Supplement: openhrt-2017-000588supp003.pdf [file openhrt-2017-000588supp003.pdf]

Table S3. Factors associated with one year MACE in multivariable cox regression analysis

| Variable                | Surgical AVR, n=351 |             |          | Unoperated patients, n=91 |              |          |
|-------------------------|---------------------|-------------|----------|---------------------------|--------------|----------|
|                         | HR                  | [95% CI]    | <i>P</i> | HR                        | [95% CI]     | <i>P</i> |
| Age, years              | 0.99                | [0.97-1.03] | 0.935    | 1.06                      | [0.98-1.15]  | 0.174    |
| NYHA class, III or IV   | 1.70                | [0.92-3.14] | 0.009    | 1.51                      | [0.50-4.54]  | 0.466    |
| LVEF                    | 0.98                | [0.95-1.01] | 0.104    | 0.97                      | [0.93-1.01]  | 0.173    |
| Coronary artery disease | 2.06                | [1.09-3.89] | 0.027    | 3.94                      | [1.44-10.77] | 0.007    |
| Diabetes mellitus       | 1.08                | [0.38-3.06] | 0.888    | 1.08                      | [0.30-4.01]  | 0.899    |

MACE, major adverse cardiovascular event; AVR, aortic valve replacement; HR, hazard ratio; CI, confidence interval; NYHA, New York Heart Association; LVEF, left ventricular ejection fraction
